# Supplementary material for: Combinatorially restricted computational design of protein-protein interfaces to produce IgG heterodimers
Source: PubMed Central journal article supplement — Sci Adv. 2024 Apr 10;10(15):eadk8157. doi: 10.1126/sciadv.adk8157 (PMC11006224; doi:10.1126/sciadv.adk8157), 2024-04-10
Supplement: sciadv.adk8157_sm.pdf [file sciadv.adk8157_sm.pdf]

Supplementary Materials for  
**Combinatorially restricted computational design of protein-protein interfaces  
to produce IgG heterodimers**

Tala Azzam *et al.*

Corresponding author: Eric J. Sundberg, [eric.sundberg@emory.edu](mailto:eric.sundberg@emory.edu); Jonathan J. Du, [jonathan.du@sydney.edu.au](mailto:jonathan.du@sydney.edu.au)

*Sci. Adv.* **10**, eadk8157 (2024)  
DOI: 10.1126/sciadv.adk8157

**This PDF file includes:**

Figs. S1 to S5  
Table S1

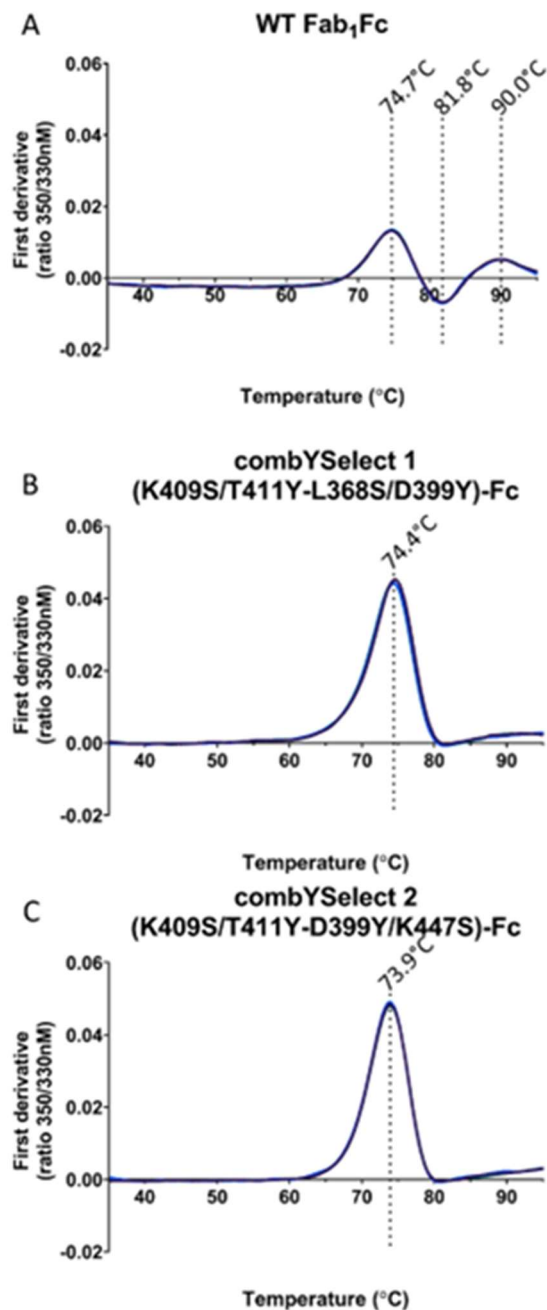

**Fig. S1. Stability of IgG heterodimers.**

First derivative plots of the melting temperatures of the Fab1Fc for WT (A), combYSelect #1 (L368S/D399Y-K409S/T411Y) Fc (B), and combYSelect #2 (D399Y/K447S-K409S/T411Y) Fc (C). The labelled temperatures are the mean of 6 total replicates, 3 for each orientation in which the mutations per chain are on the Fc fragment only, or on the Fc and Fab fragment.

Full length IgG1 (Rituximab) @pH6

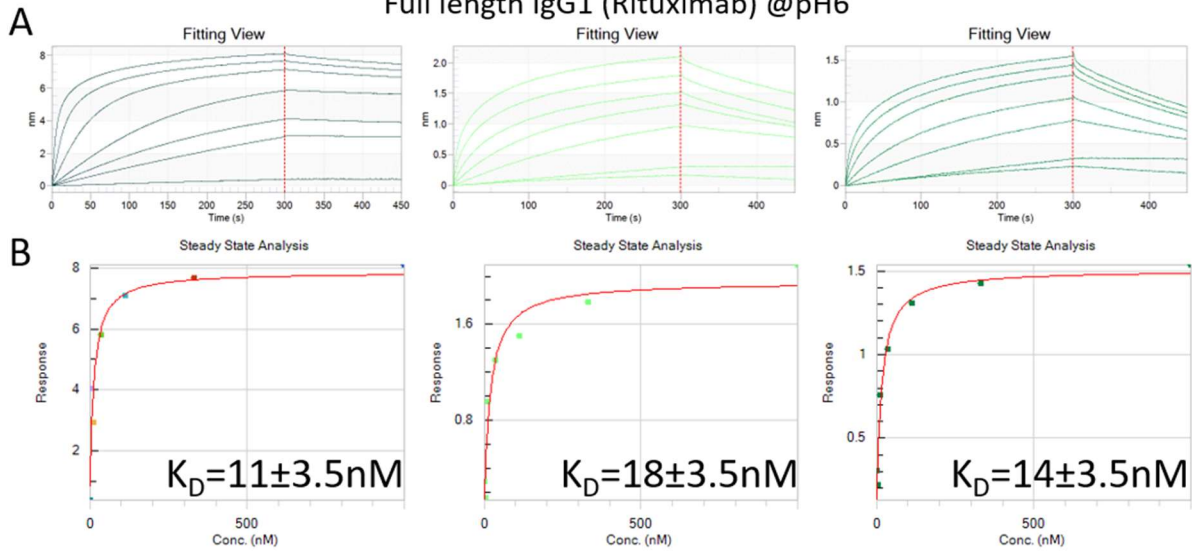

combYSelect #1 (K409S/T411Y-L368S/D399Y) @pH6

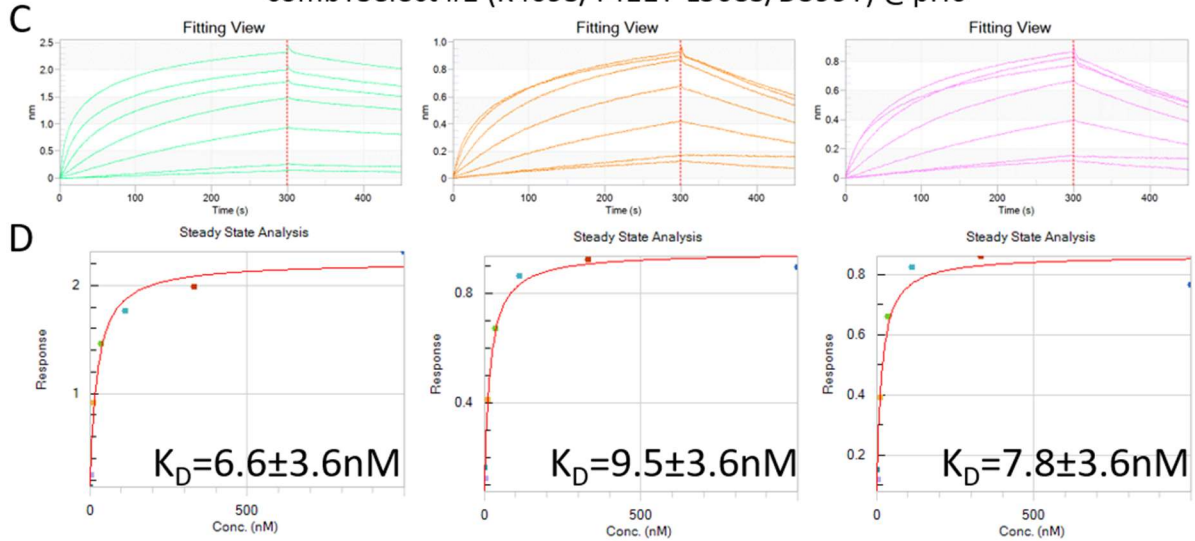

combYSelect #2 (K409S/T411Y-D399Y/K447S) @pH6

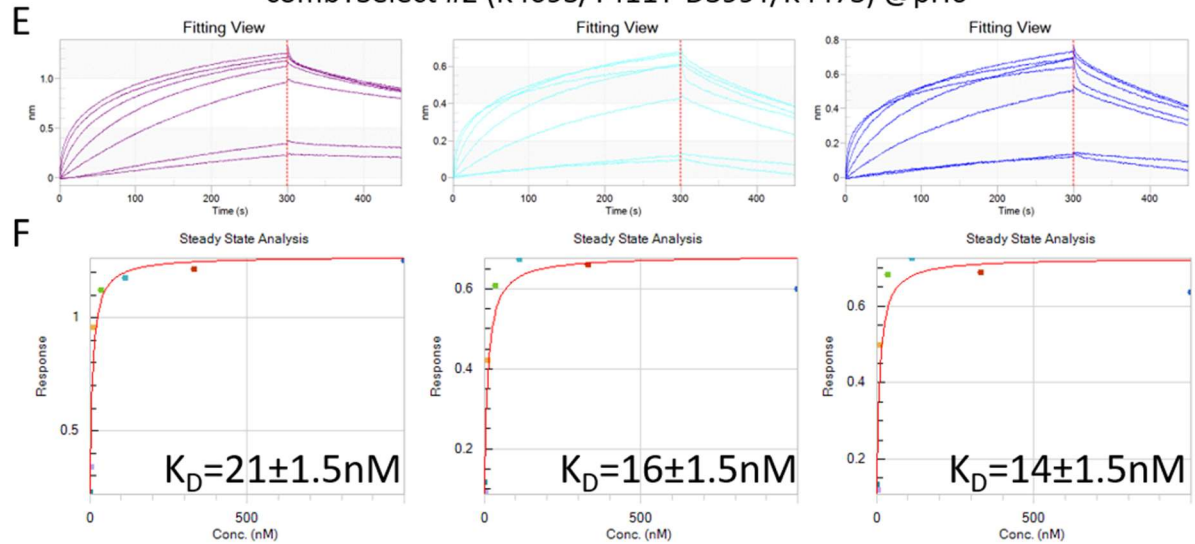

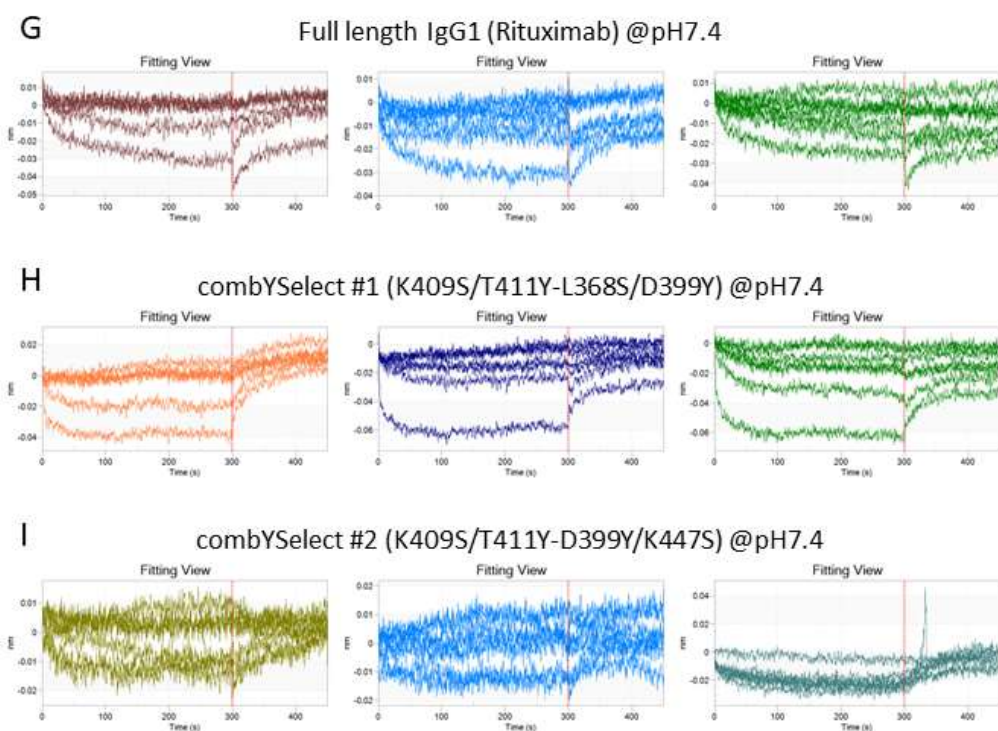

**Fig. S2. Function of IgG heterodimers.**

Sensograms and steady state plots at pH6 for WT-IgG (**A-B**), combYSelect #1 (L368S/D399Y-K409S/T411Y) (**C-D**), combYSelect #2 (D399Y/K447S-K409S/T411Y) (**E-F**) and at pH7.4 for WT-IgG (**G**), combYSelect #1 (L368S/D399Y-K409S/T411Y) (**H**) and combYSelect #2 (D399Y/K447S-K409S/T411Y) (**I**).

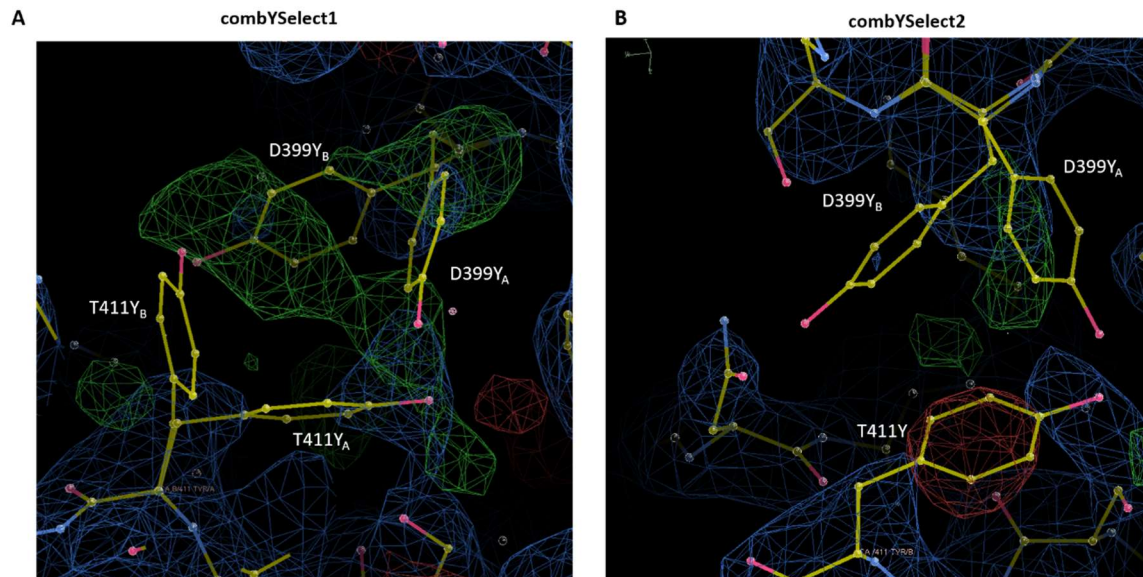

**Fig. S3. Electron density maps for T411Y and D399Y mutations of combYSelect1 and 2.** Electron density maps of the D399Y and T411Y mutations from the final refined structural models of combYSelect1 (**A**) and combYSelect2 (**B**). 2Fo-Fc map is in blue contoured to  $1\sigma$  and the Fo-Fc difference map is in green and red indicating positive and negative density respectively.

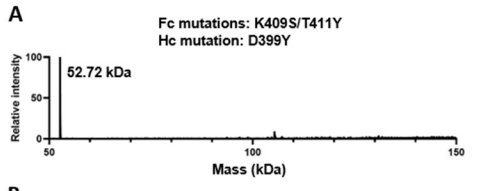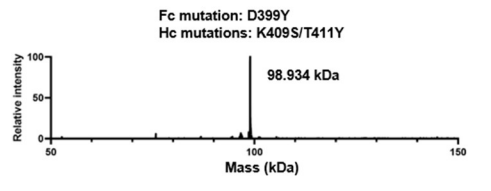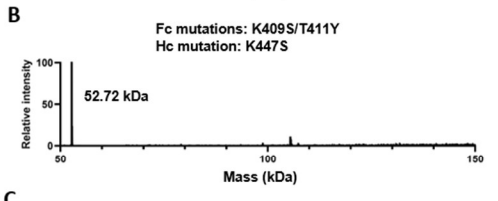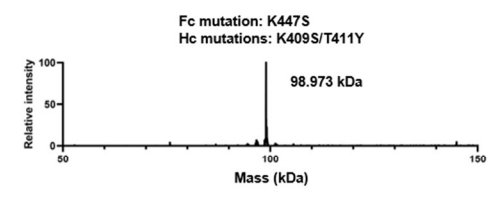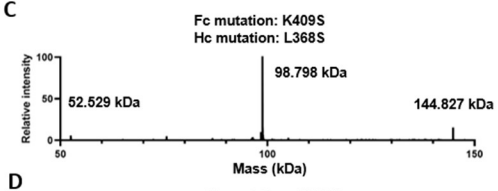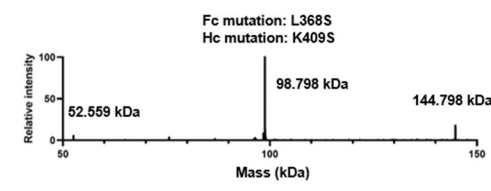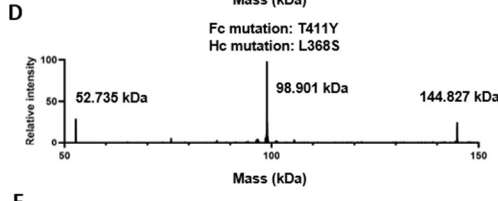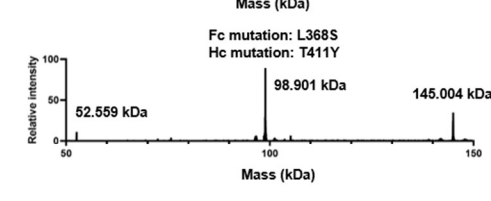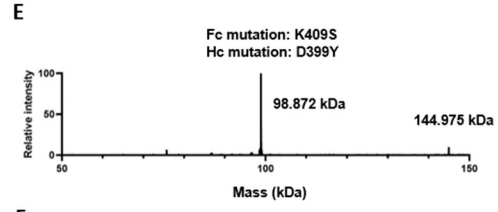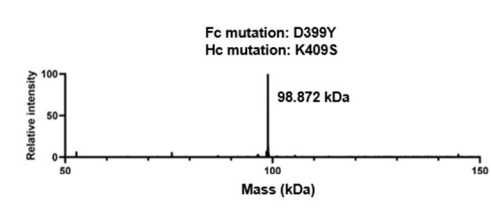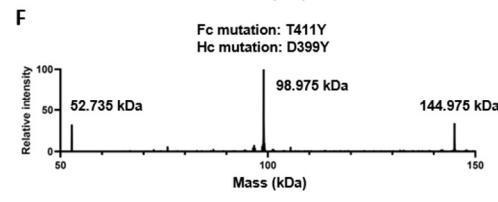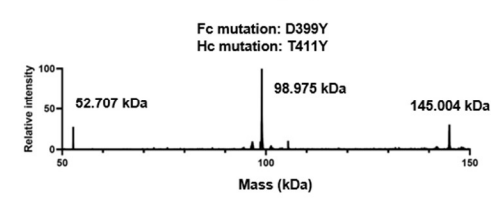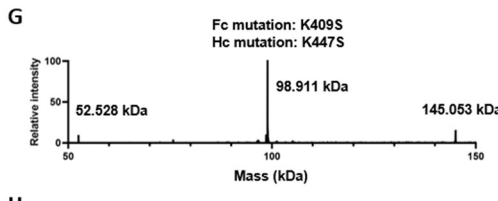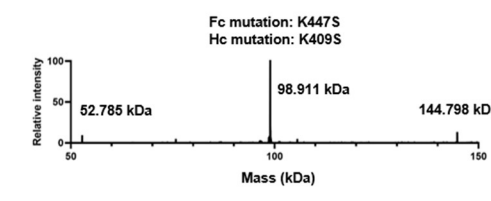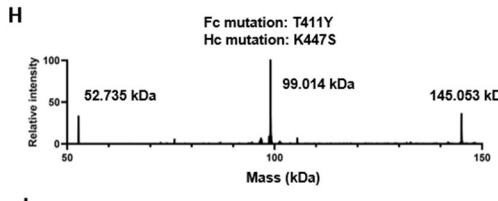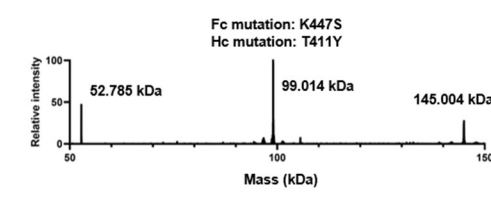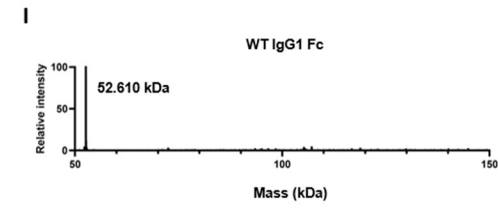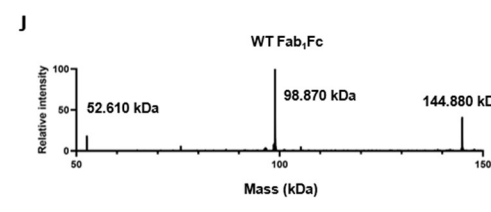

**Figure S4: Intact LC/MS Heterodimer Assessment.**

MS spectra depicting homodimer (Fc or IgG) and heterodimer formation Fab1Fc for electrostatic steering mutations D399Y-K409S/T411Y (**A**), K447S-K409S/T411Y (**B**), L368S-K409S (**C**), L368S-T411Y (**D**), D399Y-K409S (**E**), D399Y-T411Y (**F**), K447S-K409S (**G**), K447S-T411Y (**H**), WT-IgG1 Fc (**I**), WT-Fab1Fc (**J**), Percentages of each of the three peaks are determined relative to each other. Mutation(s) listed first are contained in the heavy chain and those listed second are in the Fc (Hc-Fc). All analyses were performed in triplicate.

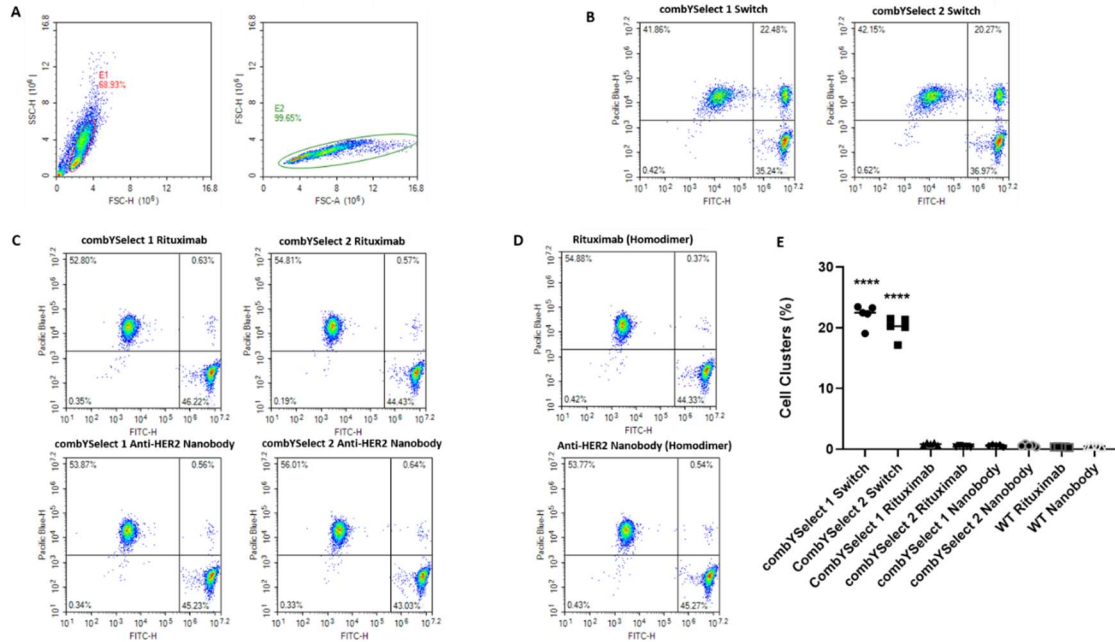

**Figure S5: Gating strategy and controls for the cell-bridging heterodimer application.**

(A) Density plots showing the gating strategy of the Raji cells stained with CFSE and BT474 stained with Calcein-Violet. (B-D) Flow cytometry density plots depicting cell cluster formations of Raji and BT474 cells when combYSelect 1 in which protomer A mutations are on the chain attached to the nanobody and protomer B mutations are on the chain attached to the Fab and combYSelect 2 in the switched orientation (B), monospecific combYSelect 1 and 2 (C), and homodimeric WT Rituximab and 5F7 nanobody (D) were added to the cell mixture. (E) Scatter plot quantifying the percentage of cell cluster formation for all of the tested antibody constructs. Statistical significance was determined by a one-way ANOVA with Tukey's multiple comparisons test. The significance of combYSelect 1 and 2 switch is in comparison to all other listed constructs.



|                                       | <b>combYSelect1</b>                           | <b>combYSelect2</b>                           |
|---------------------------------------|-----------------------------------------------|-----------------------------------------------|
| <b>Resolution range</b>               | 40.85 - 2.51 (2.6 - 2.51)                     | 40.63 - 3.001 (3.108 - 3.001)                 |
| <b>Space group</b>                    | P2 <sub>1</sub> 2 <sub>1</sub> 2 <sub>1</sub> | P2 <sub>1</sub> 2 <sub>1</sub> 2 <sub>1</sub> |
| <b>Unit cell</b>                      | 49.782 79.394 142.902<br>90 90 90             | 50.014 79.685 139.308<br>90 90 90             |
| <b>Total reflections</b>              | 19866                                         | 11398                                         |
| <b>Unique reflections</b>             | 19700 (1814)                                  | 11350 (993)                                   |
| <b>Multiplicity</b>                   | 10.2 (8.3)                                    | 11.5 (10.7)                                   |
| <b>Completeness (%)</b>               | 98.13 (91.34)                                 | 96.87 (86.27)                                 |
| <b>Mean I/sigma(I)</b>                | 30.3 (2.25)                                   | 18.5 (2.7)                                    |
| <b>Wilson B-factor</b>                | 60.22                                         | 50.24                                         |
| <b>R-merge</b>                        | 0.240 (0.961)                                 | 0.453 (3.074)                                 |
| <b>R-meas</b>                         | 0.254 (1.020)                                 | 0.474 (3.221)                                 |
| <b>R-pim</b>                          | 0.079 (0.336)                                 | 0.137 (0.949)                                 |
| <b>CC1/2</b>                          | 0.993 (0.852)                                 | 0.964 (0.628)                                 |
| <b>Reflections used in refinement</b> | 19700 (1814)                                  | 11344 (993)                                   |
| <b>Reflections used for R-free</b>    | 1970 (183)                                    | 1135 (100)                                    |
| <b>R-work</b>                         | 0.2019 (0.3633)                               | 0.1921 (0.2578)                               |
| <b>R-free</b>                         | 0.2425 (0.3945)                               | 0.2816 (0.4279)                               |
| <b>Number of non-hydrogen atoms</b>   | 3547                                          | 3535                                          |
| <b>macromolecules</b>                 | 3343                                          | 3334                                          |
| <b>ligands</b>                        | 198                                           | 198                                           |
| <b>solvent</b>                        | 6                                             | 3                                             |
| <b>Protein residues</b>               | 414                                           | 414                                           |
| <b>RMS(bonds)</b>                     | 0.014                                         | 0.011                                         |
| <b>RMS(angles)</b>                    | 1.51                                          | 1.19                                          |
| <b>Ramachandran favored (%)</b>       | 98.54                                         | 93.66                                         |
| <b>Ramachandran allowed (%)</b>       | 1.46                                          | 5.37                                          |
| <b>Ramachandran outliers (%)</b>      | 0.00                                          | 0.98                                          |
| <b>Rotamer outliers (%)</b>           | 3.09                                          | 4.39                                          |
| <b>Clashscore</b>                     | 6.74                                          | 10.92                                         |
| <b>Average B-factor</b>               | 42.75                                         | 57.72                                         |
| <b>macromolecules</b>                 | 39.15                                         | 55.93                                         |
| <b>ligands</b>                        | 103.33                                        | 88.07                                         |
| <b>solvent</b>                        | 51.73                                         | 36.01                                         |
| <b>Number of TLS groups</b>           | 2                                             | 2                                             |
| <b>PDB Code</b>                       | 8TTM                                          | 8TUD                                          |

**Table S1. Data collection and refinement statistics**
